# Supplementary figures and images for: Multi-scale approach to first-principles electron transport beyond 100 nm
Source: Royal Society of Chemistry journal article supplement (doi:10.1039/c9nr00866g), 2019-01-01

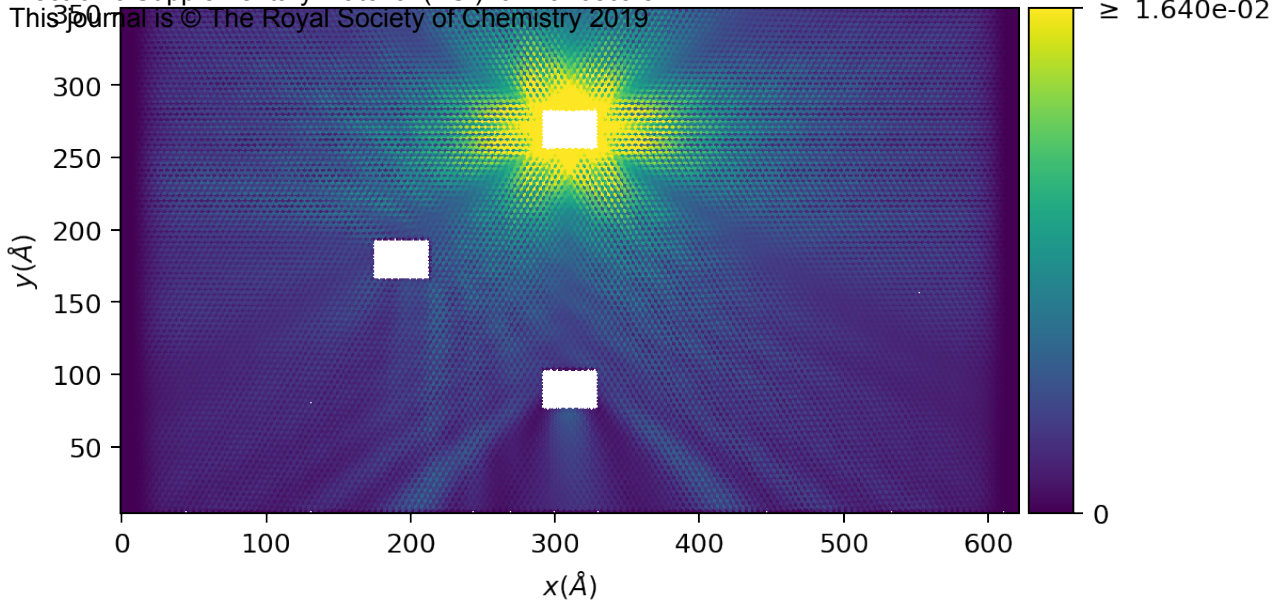

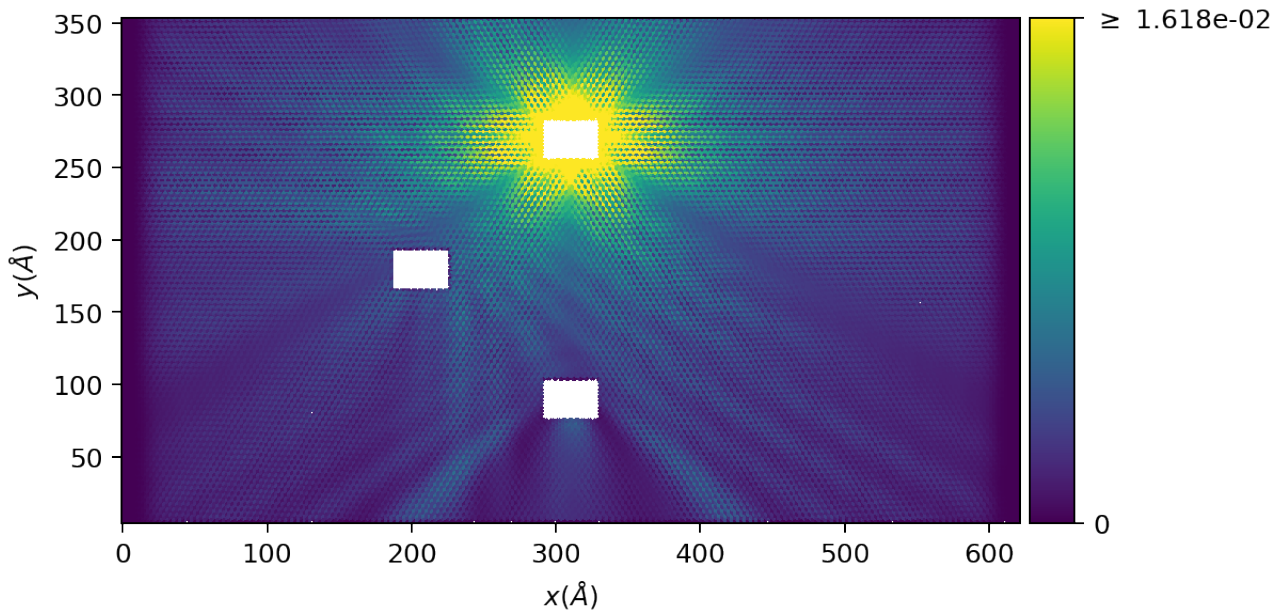

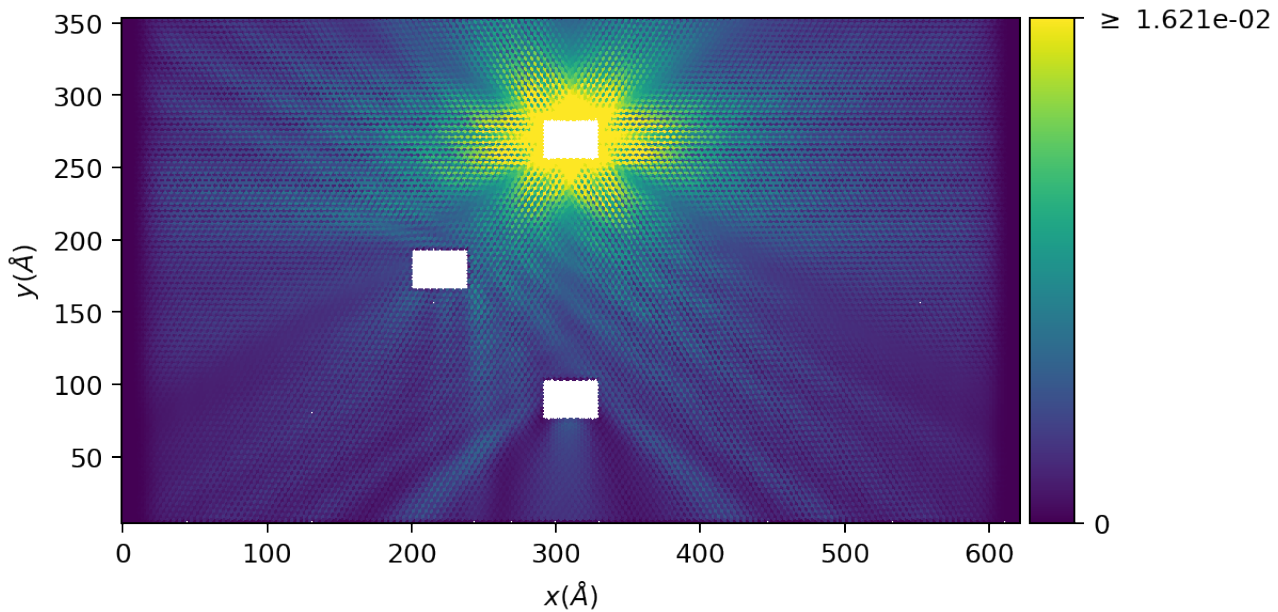

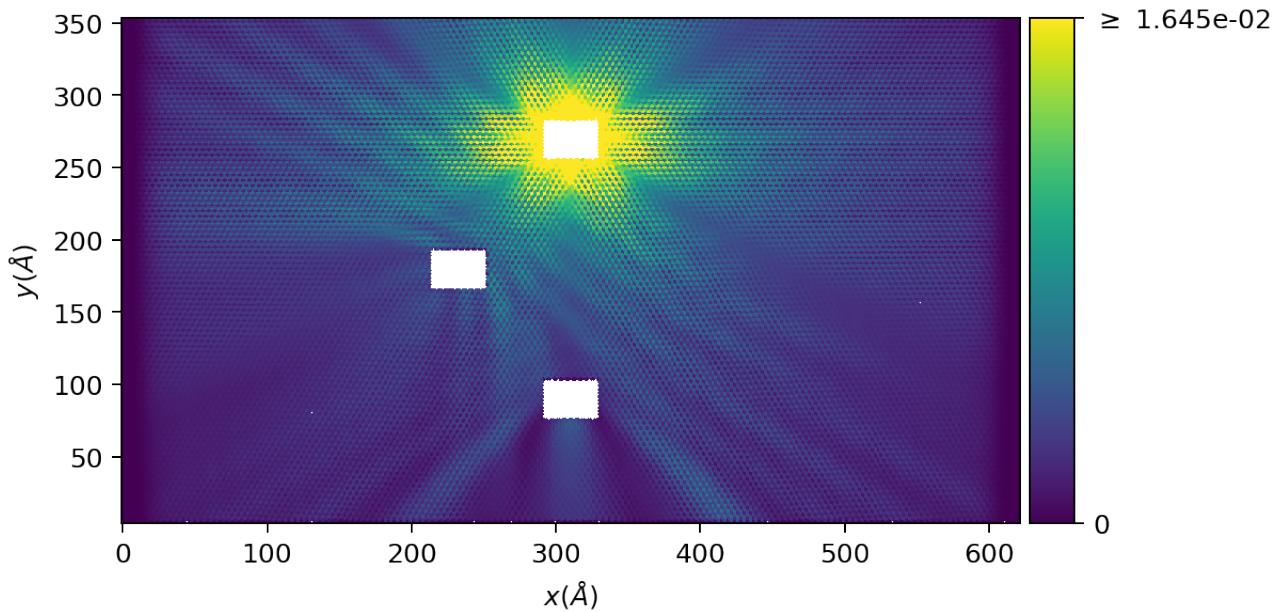

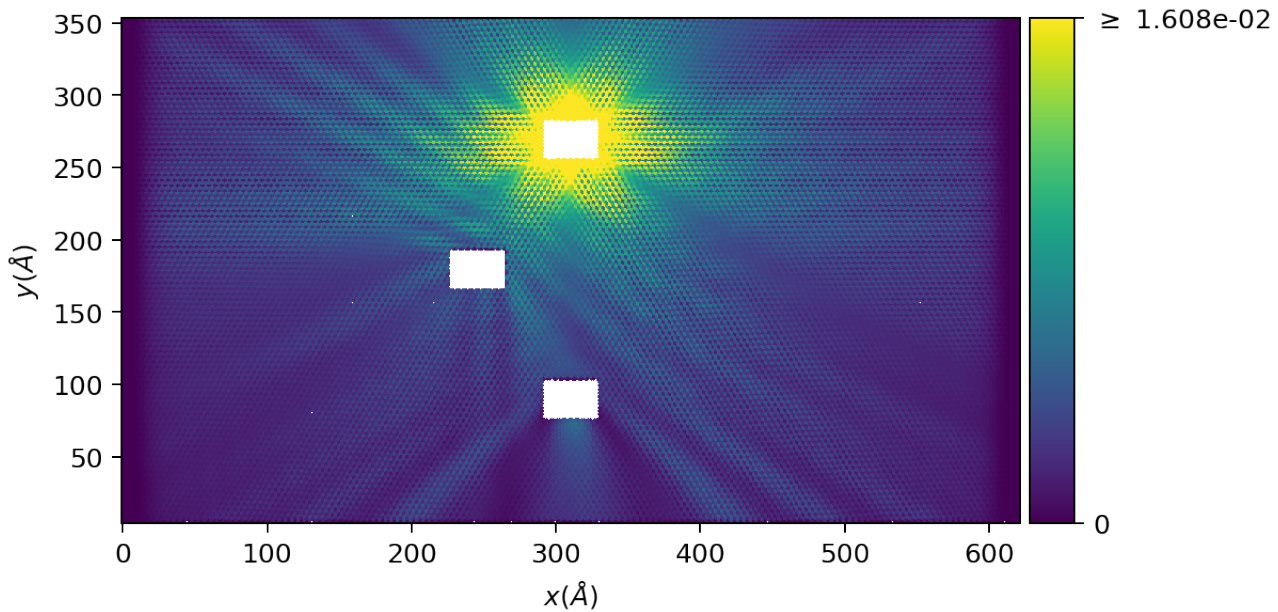



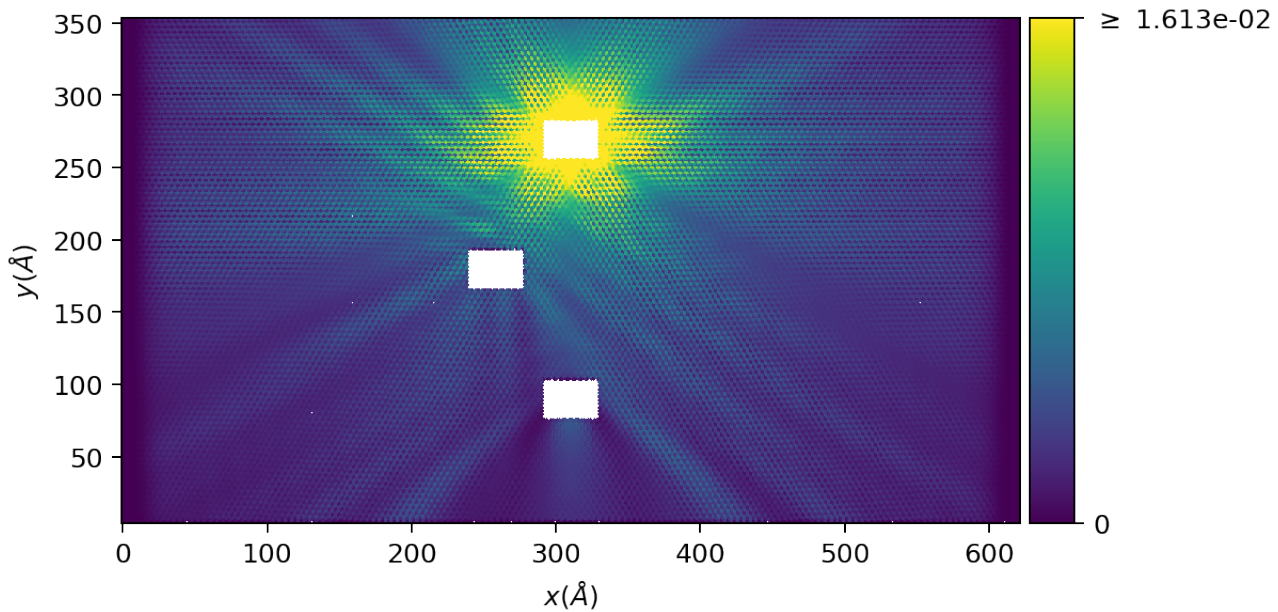

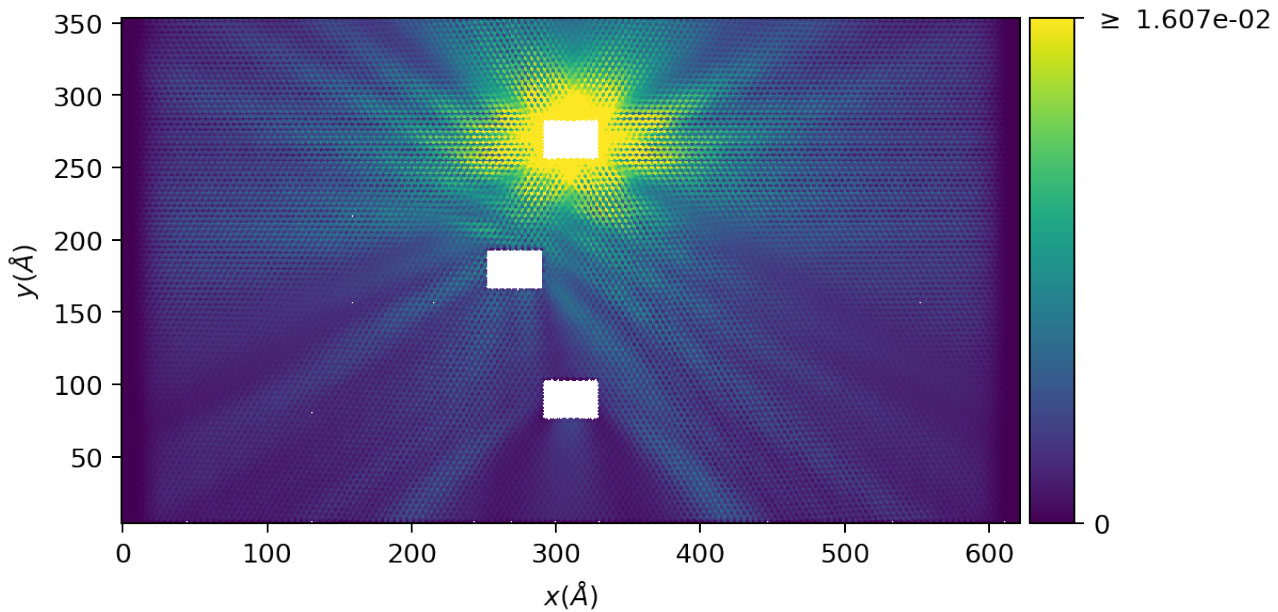

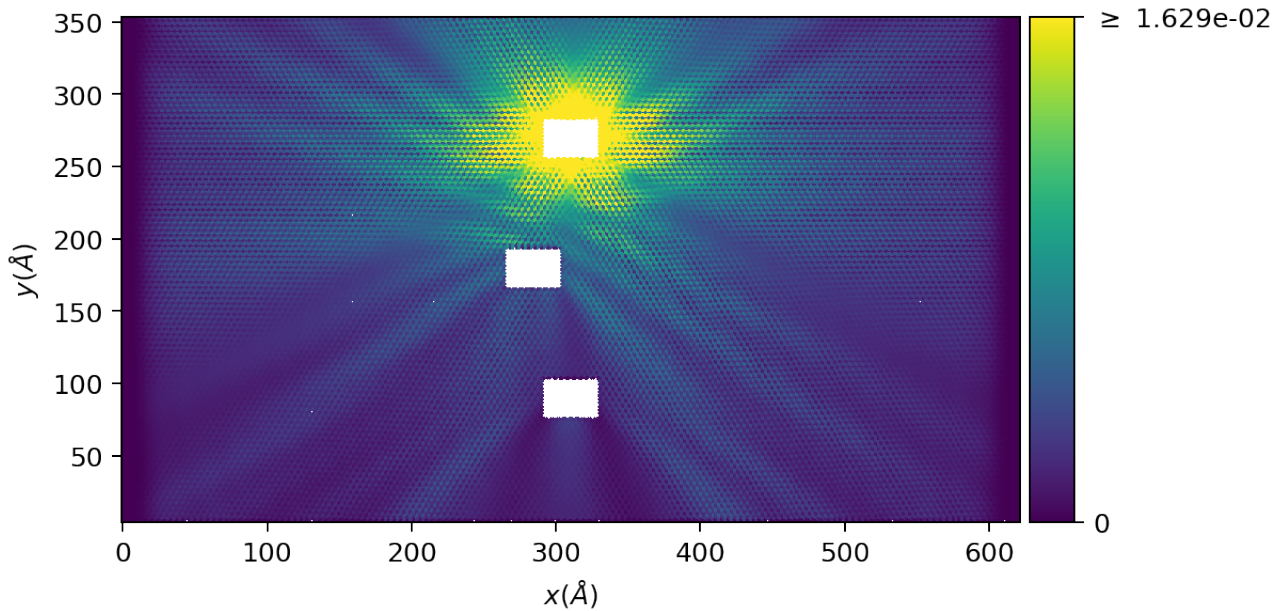



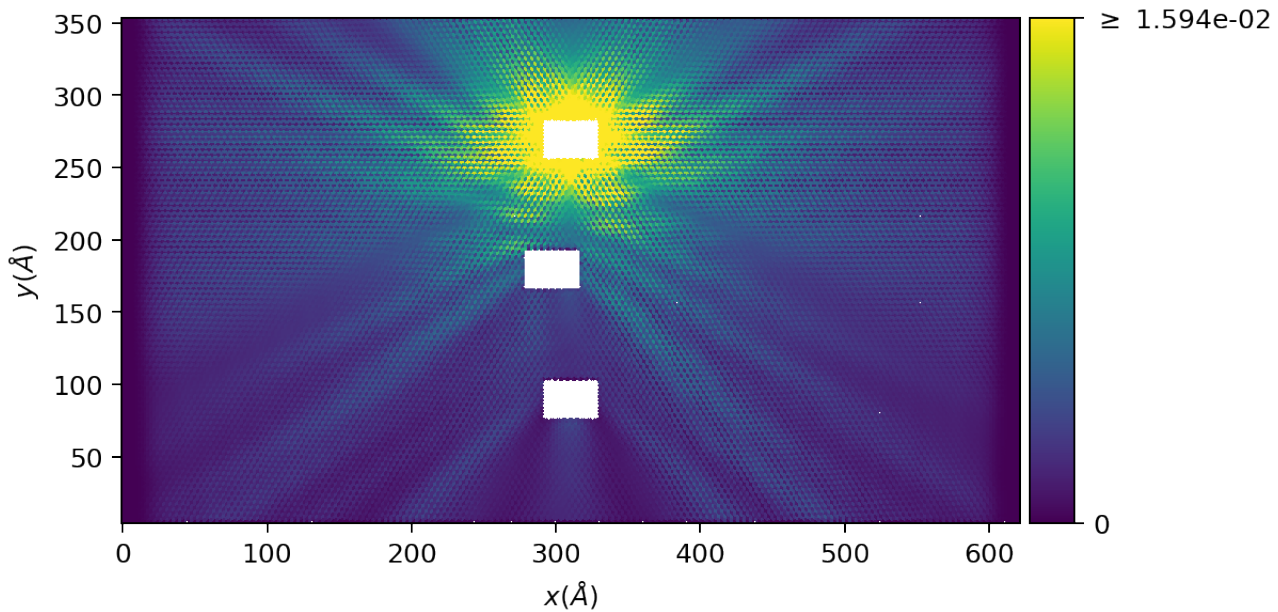

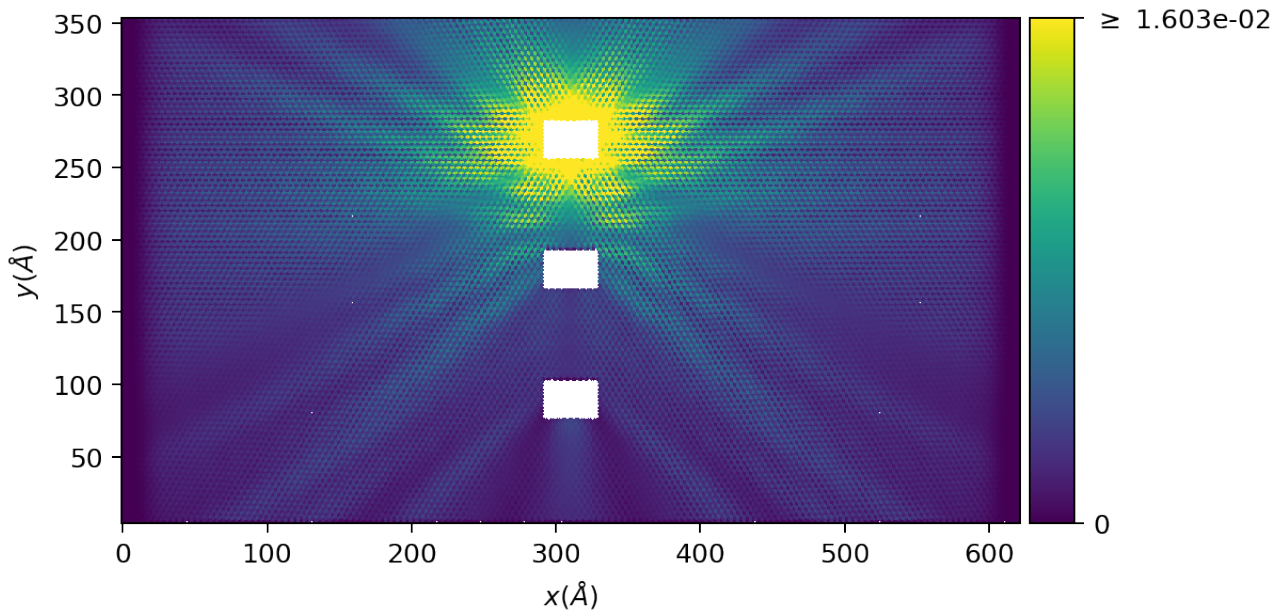

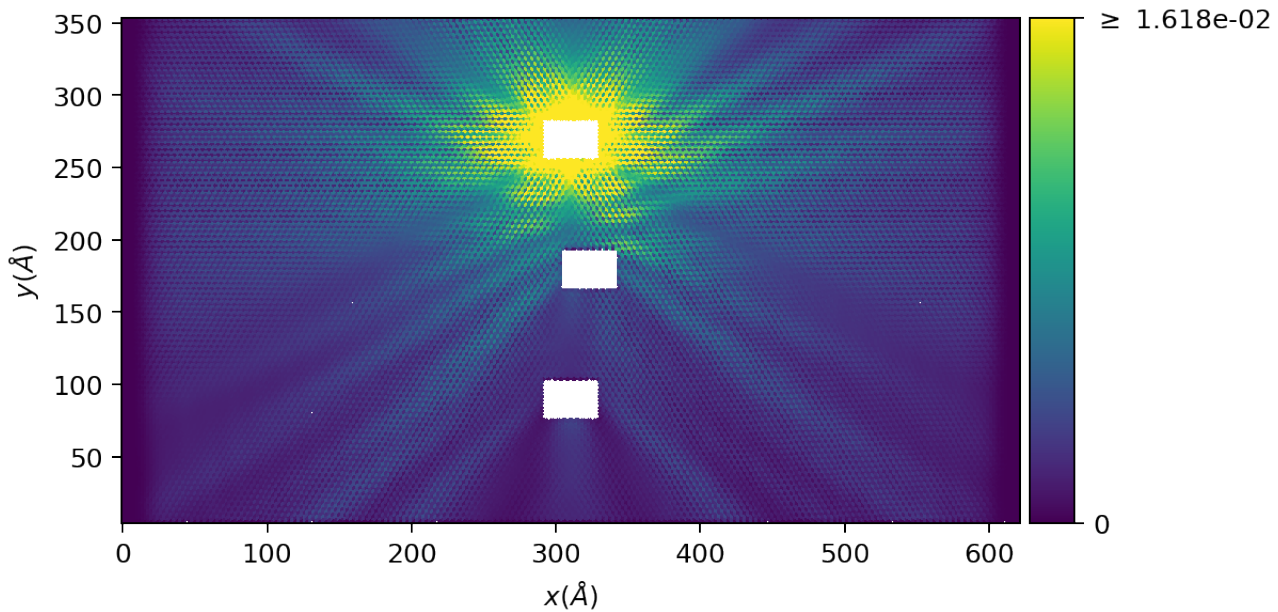

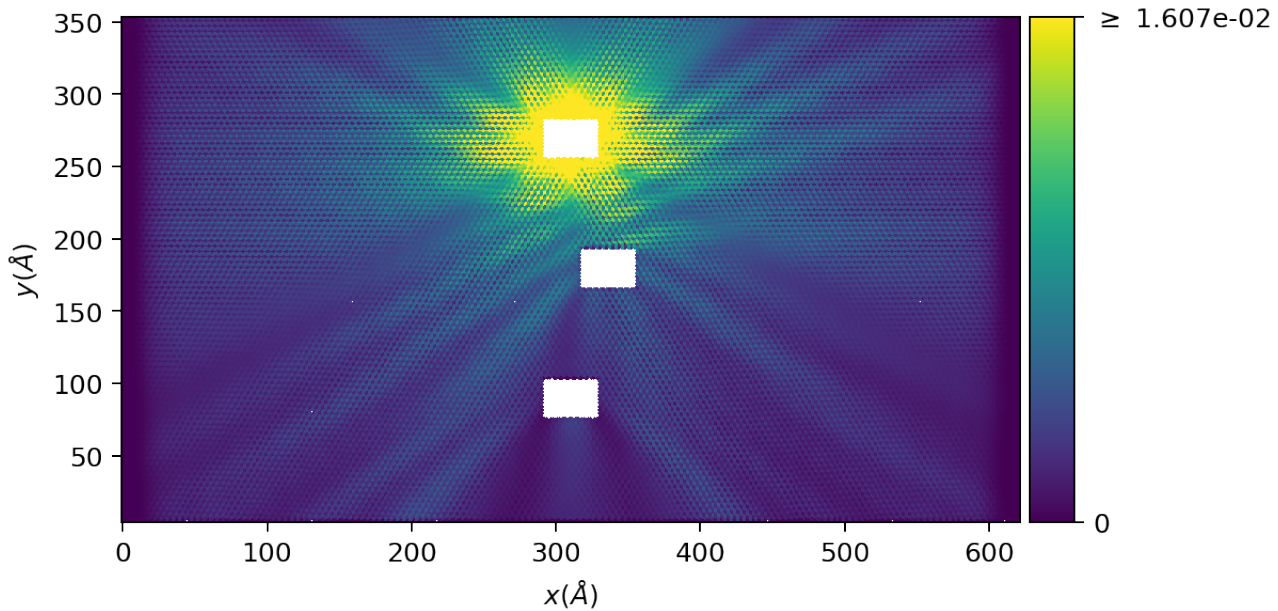

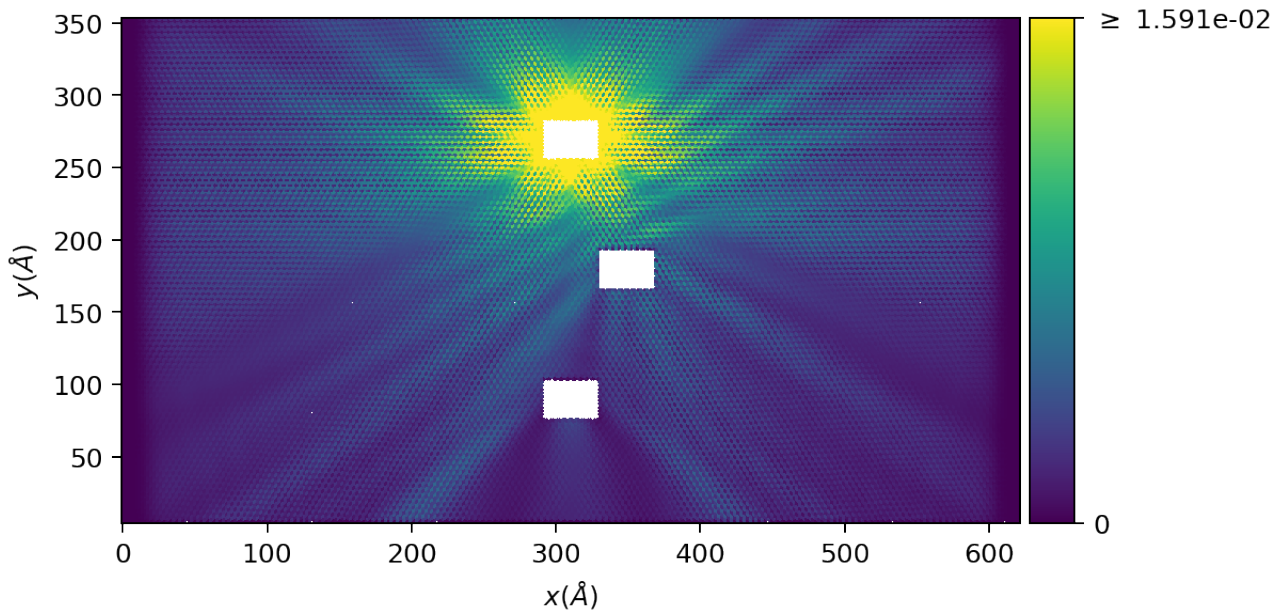



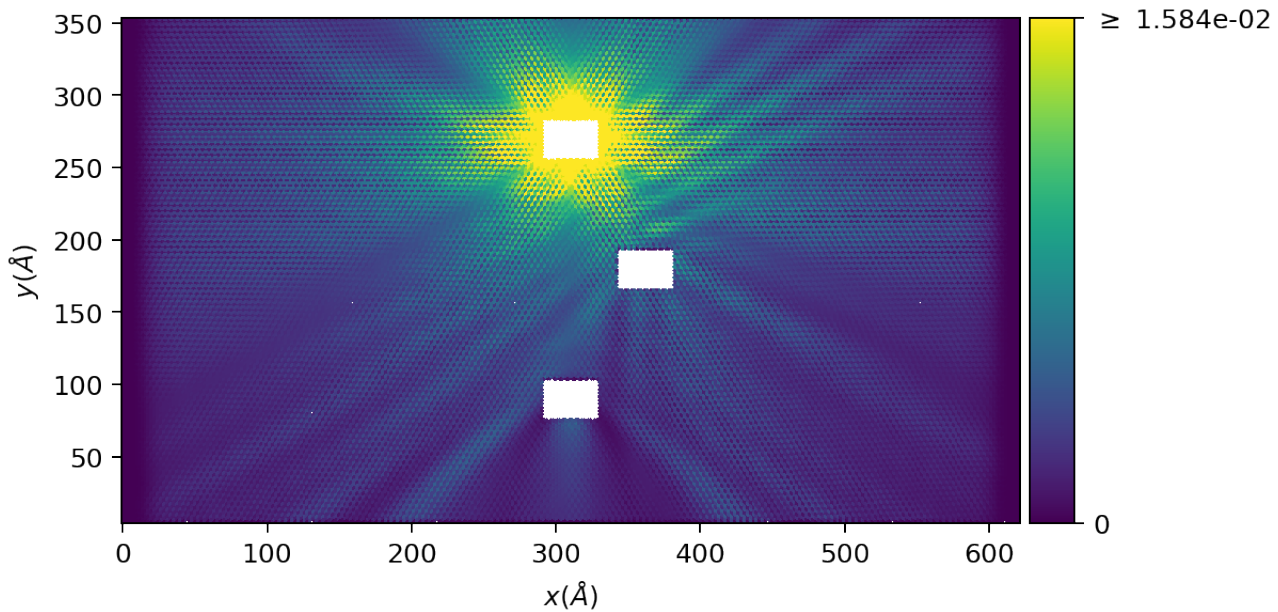

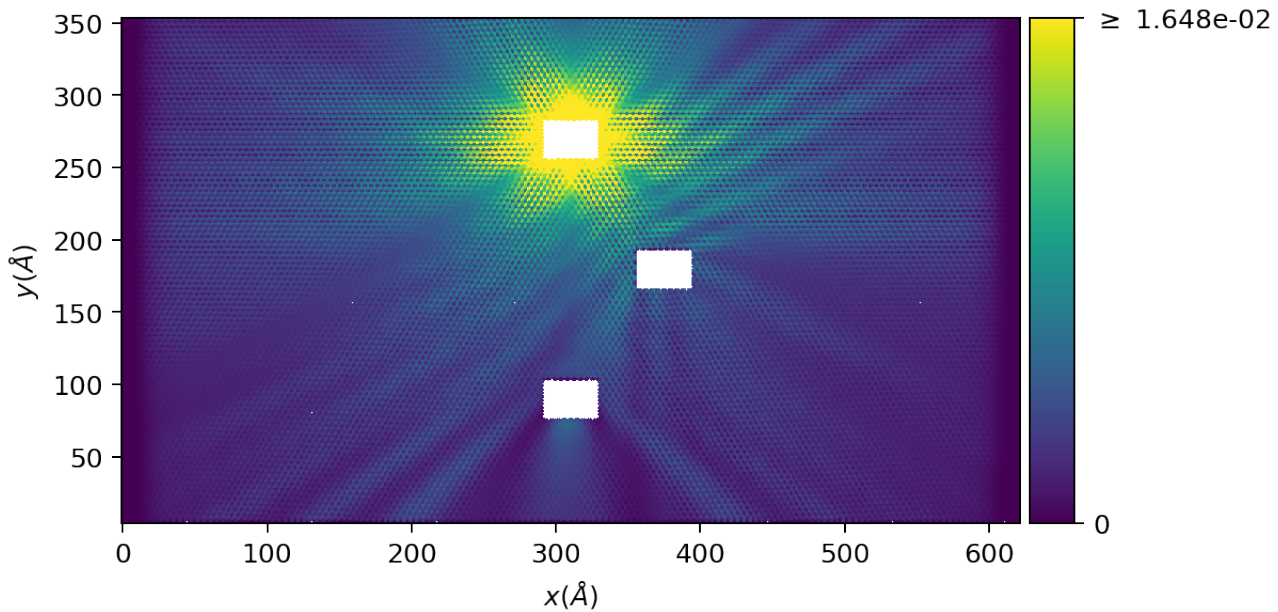

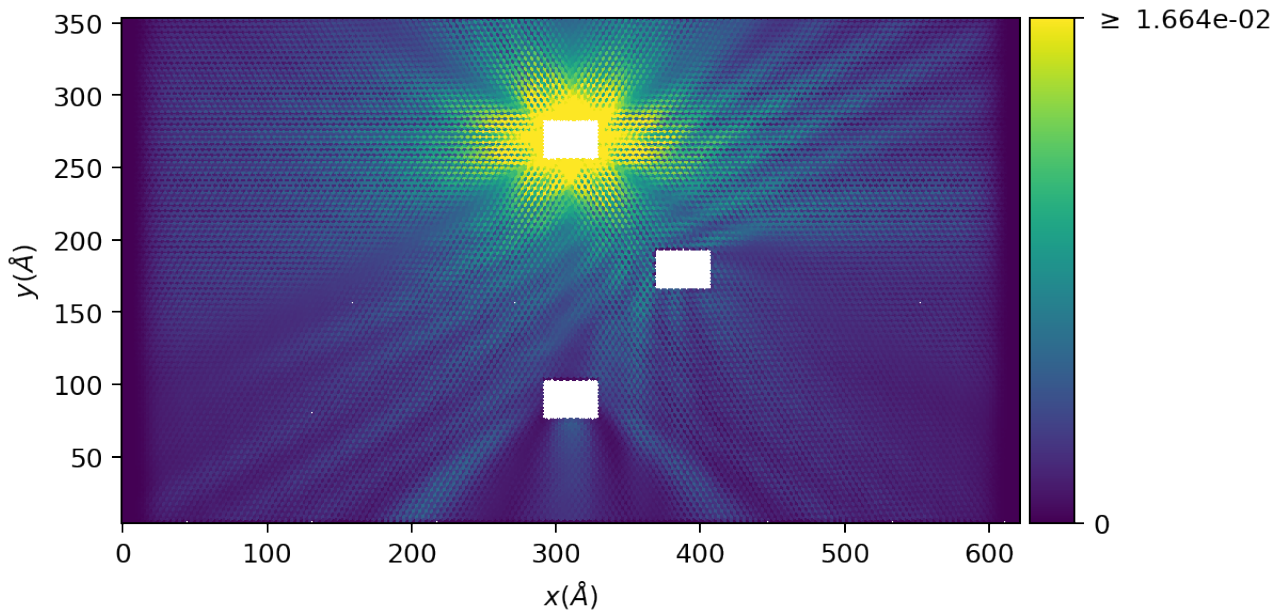

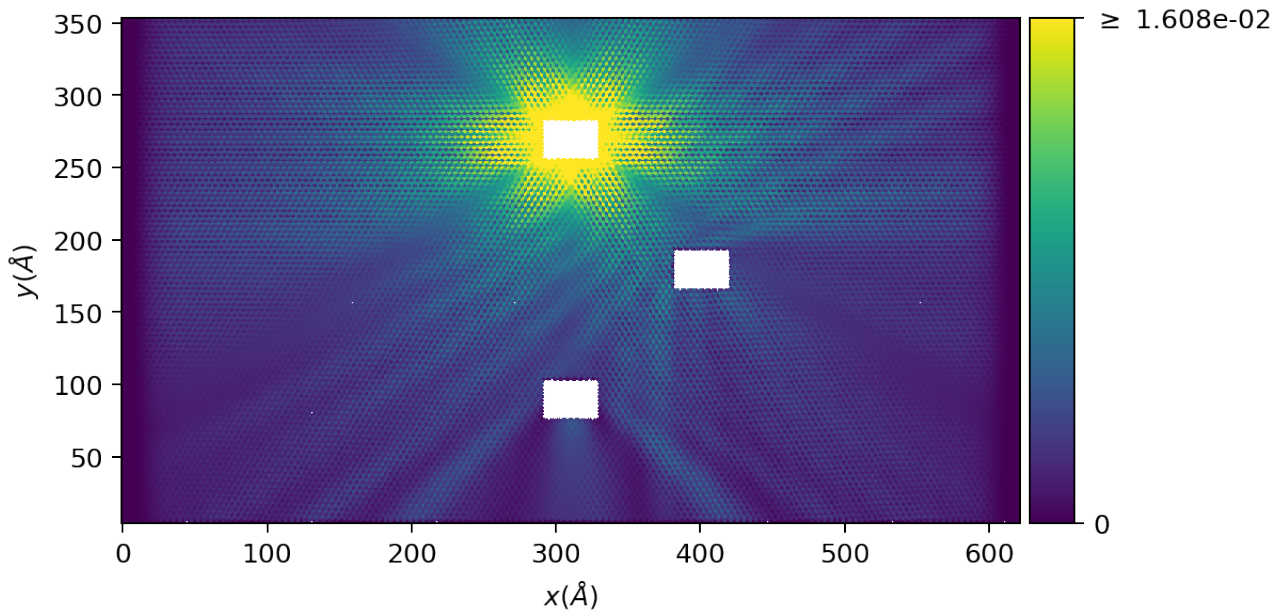

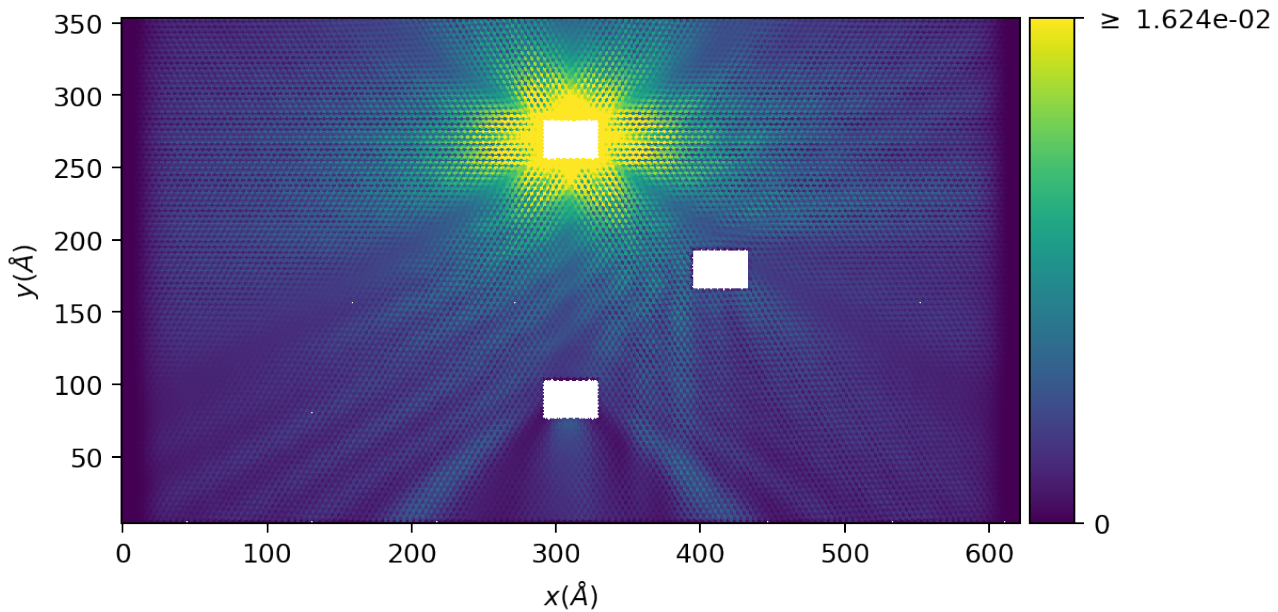



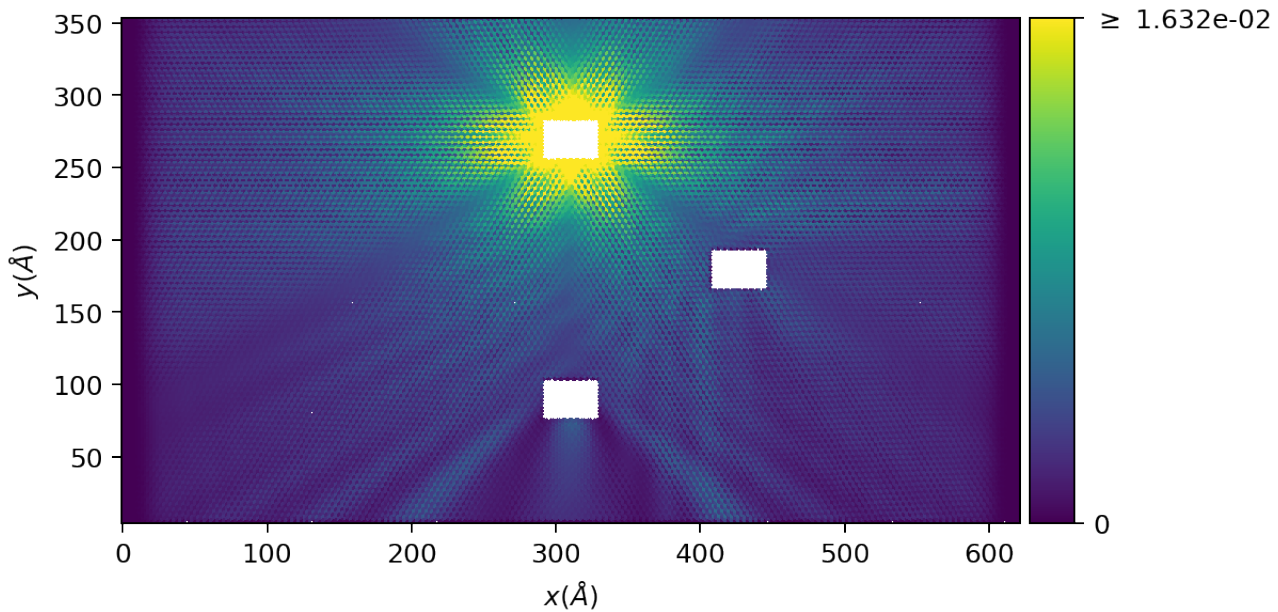

Supplement: c9nr00866g1.pdf [file c9nr00866g1.pdf]
